# Supplementary material for: Terminal oxidase mutants of the cyanobacterium Synechocystis sp. PCC 6803 show increased electrogenic activity in biological photo-voltaic systems
Source: Royal Society of Chemistry journal article supplement (doi:10.1039/c3cp52438h), 2013-01-01
Supplement: c3cp52438h.pdf [file c3cp52438h.pdf]

Supplementary Table 1 – Formulae

|                                       |                                                                                                                                                                                                                                                               |                                                                                                                                                                                                                                                                                                                                                                |
|---------------------------------------|---------------------------------------------------------------------------------------------------------------------------------------------------------------------------------------------------------------------------------------------------------------|----------------------------------------------------------------------------------------------------------------------------------------------------------------------------------------------------------------------------------------------------------------------------------------------------------------------------------------------------------------|
| Ferricyanide reduction rate           | $Rate = \sum_{i=2}^4 \left( \frac{([F]_i - [F]_{i-1})}{(t_i - t_{i-1})} \cdot \frac{2}{([C]_i + [C]_{i-1})} \cdot \frac{(t_i - t_{i-1})}{t_4} \right)$ $\equiv \sum_{i=2}^4 \left( \frac{2 \cdot ([F]_i - [F]_{i-1})}{([C]_i + [C]_{i-1}) \cdot t_4} \right)$ | Where $t_i$ is the time at which the $i^{th}$ sample was taken, and $[F]_i$ and $[C]_i$ are respectively the concentrations of ferricyanide and chlorophyll in that sample.                                                                                                                                                                                    |
| Photosynthetic oxygen evolution model | $P = P_m \cdot \tanh\left(\frac{I}{I_k}\right)$                                                                                                                                                                                                               | $P$ is the rate of photosynthetic oxygen evolution at light intensity $I$ , $P_m$ is the maximal rate, $I_k$ is a constant which describes the minimum light intensity required to photosynthetic oxygen evolution (x-axis intercept). Values of $P_m$ and $I_k$ that would create a curve which fitted the data best were found using a least squares method. |
| Ohm's law                             | $V = I \cdot R$                                                                                                                                                                                                                                               | $V$ is voltage, $I$ is current, $R$ is resistance.                                                                                                                                                                                                                                                                                                             |
| Power from Ohm's law                  | $P = I \cdot V \equiv \frac{V^2}{R}$                                                                                                                                                                                                                          | $P$ is power.                                                                                                                                                                                                                                                                                                                                                  |

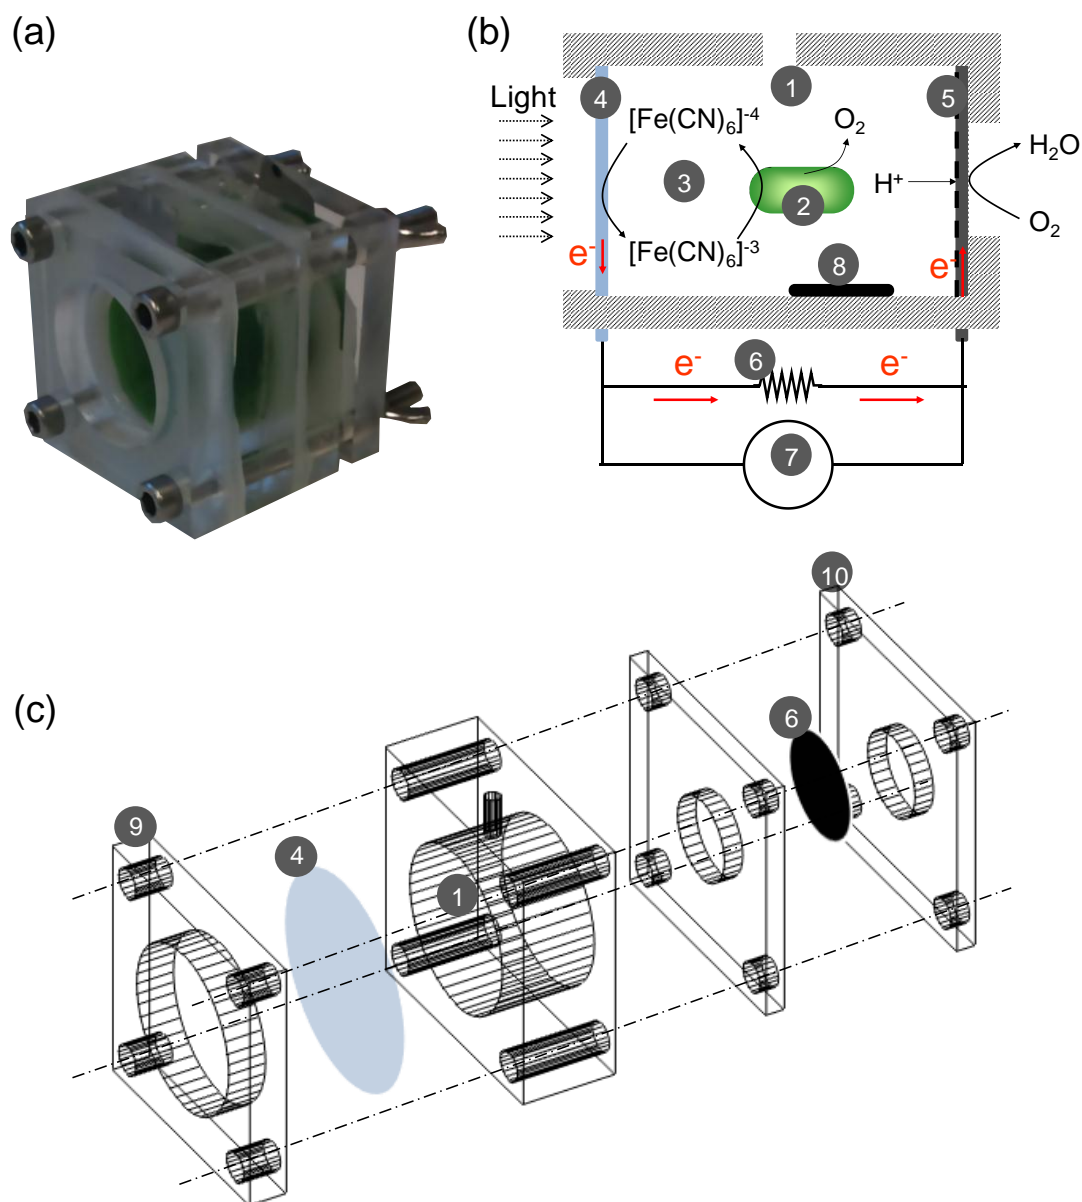

### Supplementary Figure 1 – The BPV device

(a) Photograph of the BPV device. (b) Principle of operation: within the anodic chamber (1) the cyanobacterial cells (2) reduce ferricyanide to ferrocyanide (3). This electron carrier shuttles electrons from the photosynthetic material to the transparent ITO anode (4). Simultaneously, protons (H<sup>+</sup>) diffuse from the anodic chamber across the proton exchange membrane to the cathodic membrane (5). After reaching the anode, electrons travel through an external load (6) to the cathode (5), where they are combined with oxygen and protons to re-form water. The difference in potential between anode and cathode is monitored by a precision data logger (7). Cyanobacterial cells are kept in suspension by a magnetic stirrer (8) placed underneath the anodic chamber. (c) Exploded view of a BPV device. The front clamp (9) permits light to enter the anodic chamber (1) of the BPV. The back clamp (10) has holes to allow oxygen to contact the cathode and water to escape.

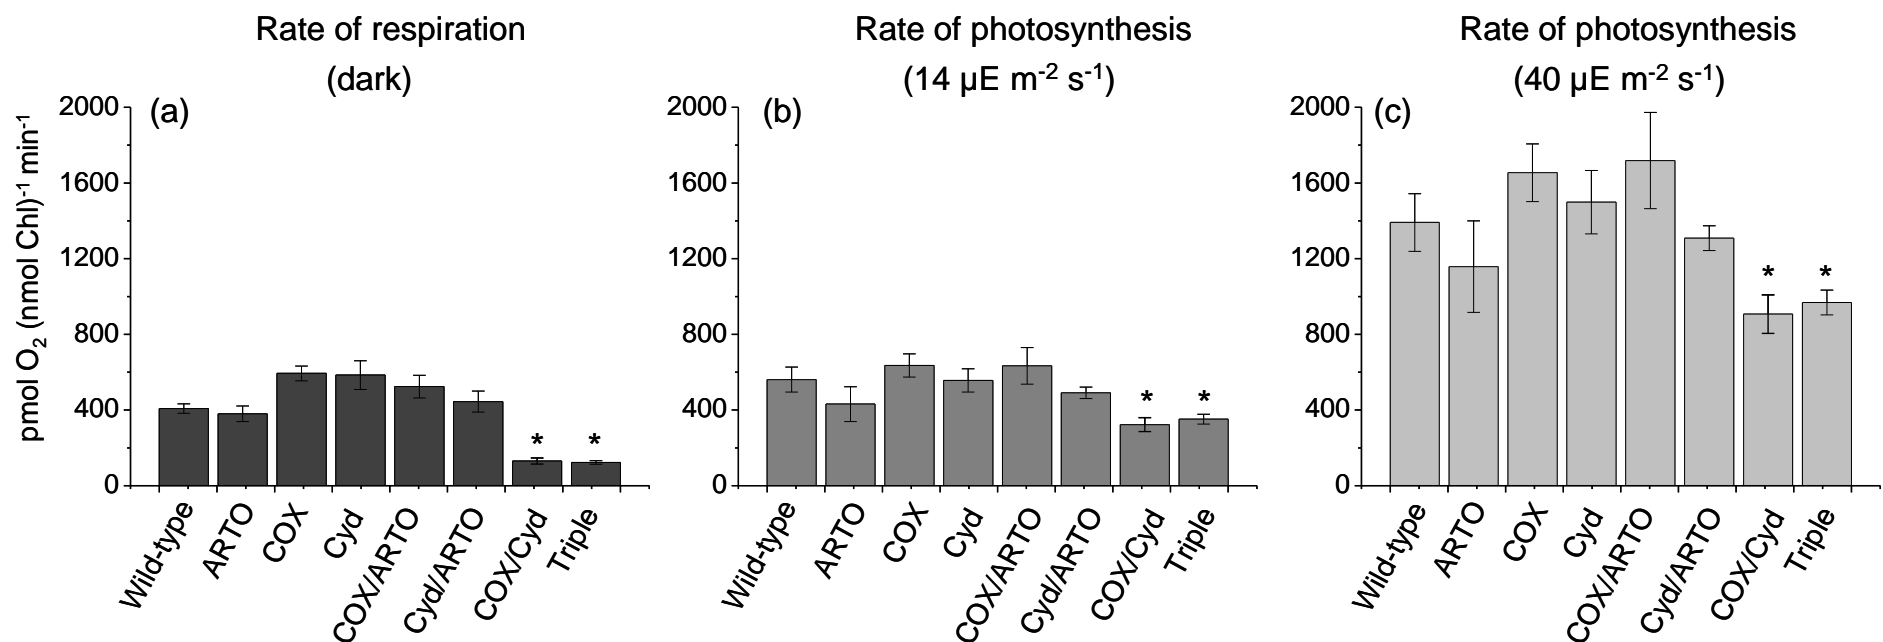

**Supplementary Figure 2 – Oxygen consumption and production rates**

The data are averages of at least three biological replicates; error bars show standard error of the mean. An asterisk indicates that an ANOVA test found the value was significantly different from the group of samples containing the wild-type with a p-value of less than or equal to 5%. For comparisons to other work, the conversion factor from  $\text{pmol O}_2 (\text{nmol chl})^{-1} \text{min}^{-1}$  to  $\mu\text{mol O}_2 (\text{mmol chl})^{-1} \text{hr}^{-1}$  is 0.06, and to  $\mu\text{mol O}_2 (\text{mg chl})^{-1} \text{hr}^{-1}$  is 67.2.

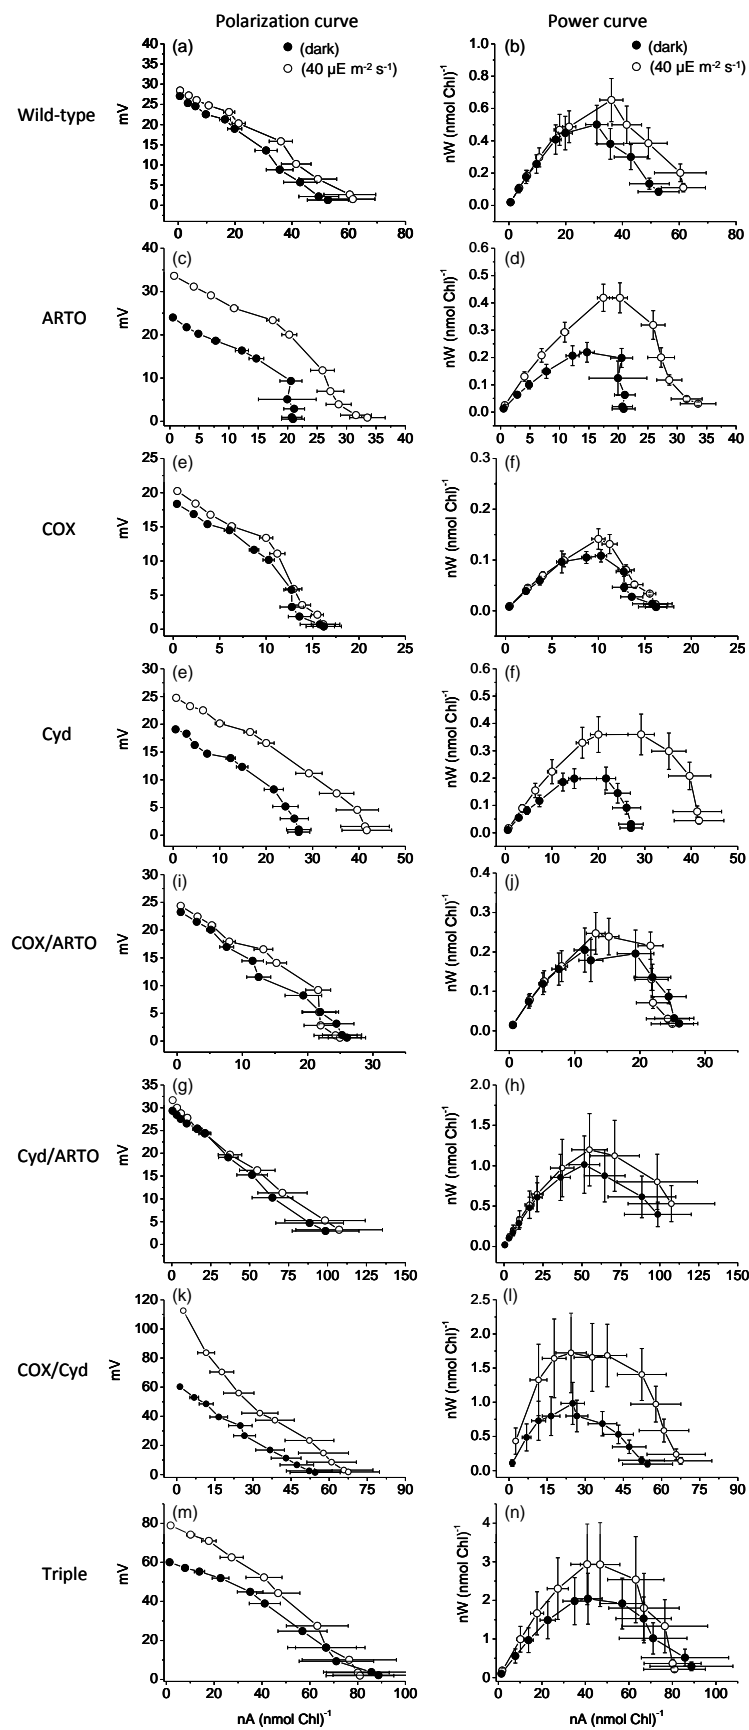

**Supplementary Figure 3 – Power curves from BPV devices operating with terminal oxidase mutants**

Parts (a), (c), (e), (g), (i), (k), and (m) are polarisation curves taken at the end of the dark period (filled circles) and or light period (open circles). Parts (b), (d), (f), (h), (j), (l), and (n) are the resulting power curves.

| Strain    | Ferricyanide reduction rate - $\text{pmol [Fe(CN)}_6\text{]}^{3-} \text{ min}^{-1} (\text{nmol chl})^{-1}$ |     |    |                                                |     |   |                                                |      |   |
|-----------|------------------------------------------------------------------------------------------------------------|-----|----|------------------------------------------------|-----|---|------------------------------------------------|------|---|
|           | Dark                                                                                                       |     |    | Light - $14 \mu\text{E m}^{-2} \text{ s}^{-1}$ |     |   | Light - $40 \mu\text{E m}^{-2} \text{ s}^{-1}$ |      |   |
|           | Average                                                                                                    | SEM | N  | Average                                        | SEM | N | Average                                        | SEM  | N |
| Wild-type | 2.0                                                                                                        | 0.4 | 8  | 6.2                                            | 1.2 | 4 | 13.7                                           | 1.4  | 4 |
| ARTO      | 7.9*                                                                                                       | 1.4 | 8  | 8.5                                            | 2.0 | 4 | 14.3                                           | 0.2  | 4 |
| COX       | 7.1*                                                                                                       | 1.1 | 8  | 15.6*                                          | 1.9 | 4 | 25.3                                           | 3.2  | 4 |
| Cyd       | 7.4*                                                                                                       | 1.8 | 7  | 15.1                                           | 4.4 | 3 | 14.7                                           | 1.3  | 4 |
| COX/ARTO  | 11.6*                                                                                                      | 1.5 | 8  | 13.4                                           | 4.4 | 4 | 20.2                                           | 2.2  | 3 |
| Cyd/ARTO  | 17.3*                                                                                                      | 5.2 | 15 | 14.2                                           | 1.9 | 8 | 44.6                                           | 13.8 | 8 |
| COX/Cyd   | 38.2*                                                                                                      | 3.4 | 11 | 8.1                                            | 0.2 | 4 | 35.7                                           | 8.4  | 8 |
| Triple    | 46.5*                                                                                                      | 5.7 | 11 | 7.1                                            | 2.0 | 4 | 27.2                                           | 4.9  | 8 |

  

| Strain    | % electrons to ferricyanide |      |    |                                                |      |   |                                                |      |   |
|-----------|-----------------------------|------|----|------------------------------------------------|------|---|------------------------------------------------|------|---|
|           | Dark                        |      |    | Light - $14 \mu\text{E m}^{-2} \text{ s}^{-1}$ |      |   | Light - $40 \mu\text{E m}^{-2} \text{ s}^{-1}$ |      |   |
|           | Average                     | SEM  | N  | Average                                        | SEM  | N | Average                                        | SEM  | N |
| Wild-type | 0.13                        | 0.03 | 8  | 0.23                                           | 0.07 | 4 | 0.33                                           | 0.04 | 4 |
| ARTO      | 0.60*                       | 0.15 | 6  | 0.41                                           | 0.10 | 3 | 0.66                                           | 0.19 | 3 |
| COX       | 0.33*                       | 0.07 | 7  | 0.75                                           | 0.14 | 4 | 0.36                                           | 0.04 | 3 |
| Cyd       | 0.30*                       | 0.03 | 7  | 0.57                                           | 0.09 | 3 | 0.32                                           | 0.03 | 4 |
| COX/ARTO  | 0.64*                       | 0.13 | 7  | 0.40                                           | 0.12 | 4 | 0.53                                           | 0.01 | 3 |
| Cyd/ARTO  | 0.93*                       | 0.31 | 13 | 0.82                                           | 0.14 | 8 | 0.87                                           | 0.35 | 6 |
| COX/Cyd   | 8.10*                       | 1.42 | 11 | 0.78                                           | 0.07 | 4 | 0.88                                           | 0.18 | 8 |
| Triple    | 10.49*                      | 1.67 | 10 | 0.59                                           | 0.25 | 4 | 0.84                                           | 0.18 | 6 |

**Supplementary Table 2 - Ferricyanide reduction data**

An asterisk indicates that an ANOVA test found the value differed significantly from the group of samples containing the wild-type with a p-value of less than or equal to 5%. SEM = Standard error of the mean.

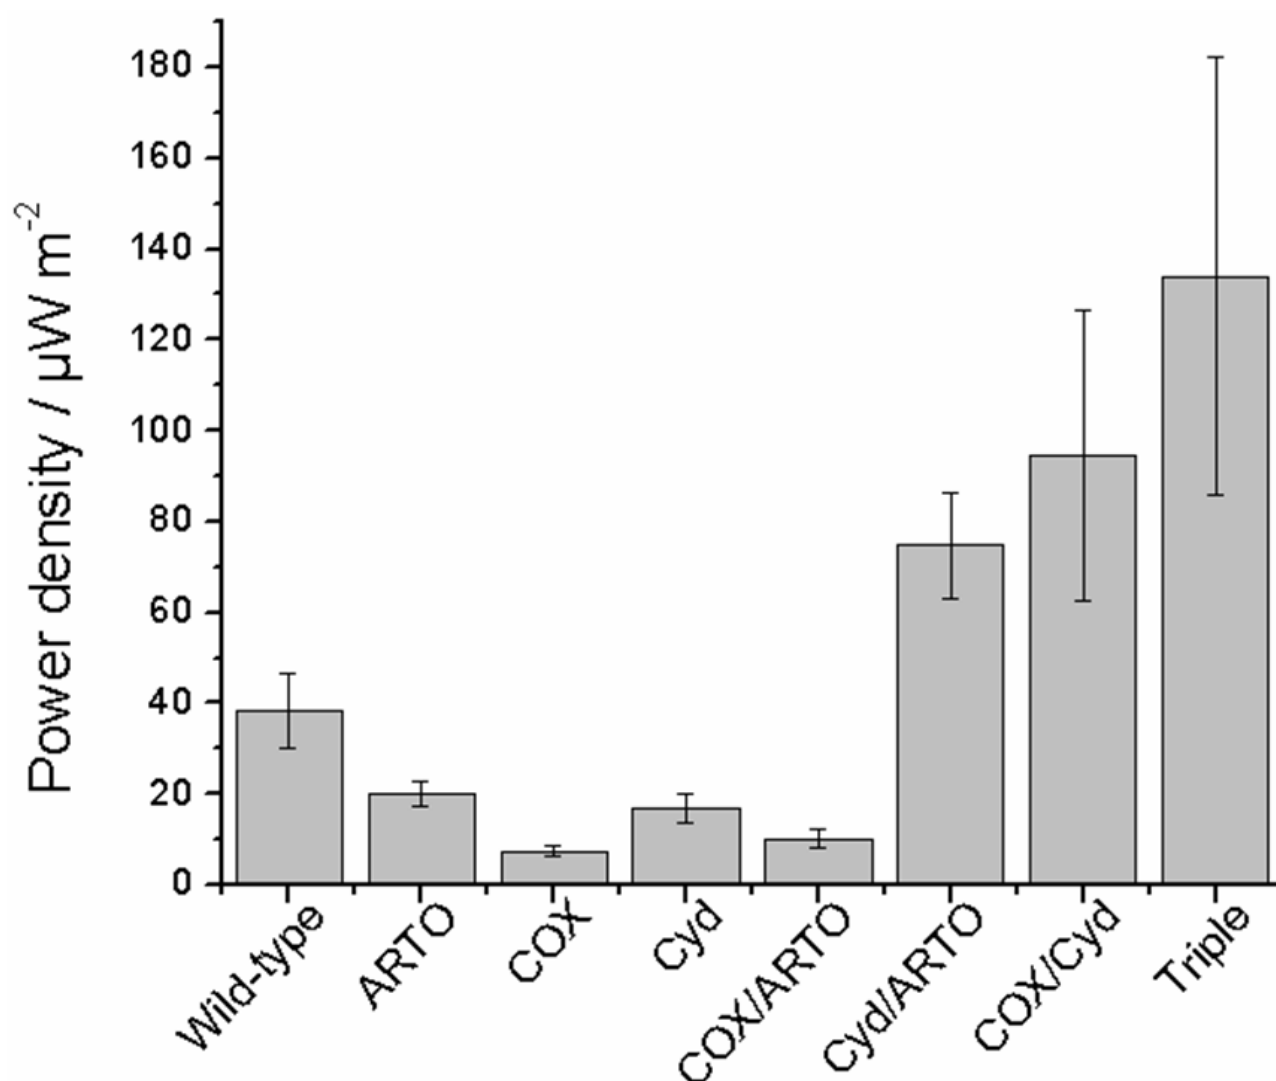

**Supplementary Figure 4 – Raw BPV Power Output**

Data are averages of peak power produced at the end of a period of illumination from at least four biological replicates; error bars indicate standard error of the mean; power is normalised to anode area; cell density was  $2 \pm 0.3$  (nmol chl)  $\text{mL}^{-1}$ .

|           | Ferricyanide reduction rate – pmol [Fe(CN) <sub>6</sub> ] <sup>3-</sup> min <sup>-1</sup> (nmol chl) <sup>-1</sup> |                                               |                                               |
|-----------|--------------------------------------------------------------------------------------------------------------------|-----------------------------------------------|-----------------------------------------------|
| Strain    | Dark                                                                                                               | Light - 14 μE m <sup>-2</sup> s <sup>-1</sup> | Light - 40 μE m <sup>-2</sup> s <sup>-1</sup> |
| Wild-type | 2.0 ± 0.4                                                                                                          | 6.2 ± 1.2                                     | 14 ± 1.4                                      |
| Triple    | 46 ± 5.7                                                                                                           | 7.1 ± 2.0                                     | 27 ± 4.9                                      |
| M55       | 100 ± 19                                                                                                           | 61 ± 16                                       | 34 ± 4.0                                      |

Supplementary Table 3 – Ferricyanide reduction; comparison with M55
